# Supplementary material for: Phase II evaluation of LY2603618, a first-generation CHK1 inhibitor, in combination with pemetrexed in patients with advanced or metastatic non-small cell lung cancer
Source: Springer Nature journal article supplement (doi:10.1007/s10637-016-0368-1), 2016-06-27
Supplement: MOESM1 [file 10289146]

**Supplemental Methods**

**Pharmacokinetics**

LY2603618 and pemetrexed PK parameters were computed by standard non-compartmental methods of analysis using WinNonlin® Enterprise Version 5.3 and Phoenix™ WinNonlin® 6.3. The maximum plasma concentration (Cmax) and the area under the plasma concentration-time curve (AUC) from time 0 to infinity (AUC (0-∞)) within cycles 1 and 2 were calculated to assess the human LY2603618 systemic exposure relative to the LY2603618 exposure (Cmax, AUC (0-∞)) that correlated to the maximal pharmacodynamic effect observed in non-clinical xenograft models. The percent of AUC(0–∞) extrapolated from area under the plasma concentration-time curve from time zero to time t, where t is the last time point with a measurable concentration (AUC(0–tlast)) (%AUC (tlast-∞)), terminal elimination half-life (t½), volume of distribution at steady-state (Vss), systemic clearance (CL), and intercycle accumulation ratio (RA) were also assessed. The terminal elimination phase of LY2603618 was determined using concentration-time data from 2 to 29 hours after the start of the infusion, unless data were available on day 8 (167 hours) after LY2603618 infusion.

**Biomarker analysis**

Blood was collected into 7.5 ml CellSave® Tubes from patients at 4 different time points (baseline, Visit 1 Day 1, Visit 2 Day 1, Visit 3 Day 1) for the assessment of several markers (Apocell Biosciences, Houston, TX, USA) from CTCs and peripheral blood mononuclear cells (PBMCs). The CTCs were isolated with the CellSearch® Profile Kit, and EpCAM-enriched cells were placed on a proprietary glass slide. Immunofluorescent staining was performed to detect and enumerate CTCs (scatter nuclei+/CK+/CD45-) and analyze expression of the following biomarkers by laser scanning cytometry if CTCs were detected at baseline: p53 (D07) nuclear mean fluorescent intensity (MFI), P53 (D07) cytoplasmic MFI, and p53 (D07) nuclear/cytoplasmic ratio.

DNA (cpDNA) isolated with the QIAamp® DNA Blood Mini Kit (Qiagen, Inc., Valencia, CA) using a validated quantitative polymerase chain reaction (qPCR) method for β-actin by qPCR (Transgenomic, Inc., Omaha, NE) utilizing the following primers: 5'-CCTGGCACCCAGCACAAT-3', 5'-GCCGATCCACACGGAGTACT-3', and 5’-FAM and 3’-BHQ labeled probe 5'-TCATTGCTCCTCCTGAGCGC-3' (Sigma-Aldrich, Inc., St. Louis, MO).

The CK18 (M30) and CK18 (M65) methods used at Quintiles Laboratories Europe (The Alba Campus, Rosebank, Livingston, West Lothian, United Kingdom) were based on a solid-phase sandwich immunoassay. For the CK18 (M30) method, antibody M5 was used to target CK18, while antibody M30 with horseradish peroxidase bound to it was attached to the CK18AP396 neo-epitope. Similarly, for the CK18 (M65) method, antibody M6 was used to target CK18 and antibody M5 with horseradish peroxidase bound to it was attached to a different CK18 epitope. In both methods, the well was washed to remove any excess patient sample or antibody, TMB substrate was added to induce a color development, and the absorbance of the sample was read per the manufacturer’s instructions.

**Supplemental Results**

**Circulating biomarkers**

**Supplemental Table 1**: Association between Levels of Circulating Markers and Clinical

Response/Benefit Rate

| **Marker** | **Derived Marker Endpoint** | **Response Endpoint** | **P-value** |
| --- | --- | --- | --- |
| Circulating DNA | Maximum Absolute Change from Baseline | ORR | 0.657 |
| CBR | 0.234 |
| Maximum Change from Baseline | ORR | 0.590 |
| CBR | 0.143 |
| CK18 M30 | Maximum Absolute Change from Baseline | ORR | 0.201 |
| CBR | 0.176 |
| Maximum Change from Baseline | ORR | 0.281 |
| CBR | 0.092 |
| CK18 M65 | Maximum Absolute Change from Baseline | ORR | 0.586 |
| CBR | 0.235 |
| Maximum Change from Baseline | ORR | 0.106 |
| CBR | 0.413 |
| CK18 M30/M65 Ratio | Maximum Absolute Change from Baseline | ORR | 0.447 |
| CBR | 0.335 |
| Maximum Change from Baseline | ORR | 0.462 |
| CBR | 0.405 |
| CTCs | Maximum Absolute Change from Baseline | ORR | 0.001 |
| CBR | 0.703 |
| Maximum Change from Baseline | ORR | 0.425 |
| CBR | 0.625 |
